# Supplementary material
Source: PubMed Central journal article supplement (PMC8777199)
Supplement: bloodBLD2021012888-suppl1.pdf [file bloodBLD2021012888-suppl1.pdf]

## Appendix 2- Balance Check after matching

| Covariate                        | Level              | Statistics | LOT1 PPx    |            | Parametric P-value* | Standardized Difference |
|----------------------------------|--------------------|------------|-------------|------------|---------------------|-------------------------|
|                                  |                    |            | IV N=179    | IT N=179   |                     |                         |
| Sex                              | Male               | N (Col%)   | 99 (55.31)  | 95 (53.07) | 0.671               | 0.045                   |
|                                  | Female             | N (Col%)   | 80 (44.69)  | 84 (46.93) |                     | 0.045                   |
| Number EN sites                  | Less than 2 sites  | N (Col%)   | 101 (56.42) | 104 (58.1) | 0.749               | 0.034                   |
|                                  | 2 sites or greater | N (Col%)   | 78 (43.58)  | 75 (41.9)  |                     | 0.034                   |
| Renal and/or Adrenal involvement | No                 | N (Col%)   | 160 (89.39) | 162 (90.5) | 0.725               | 0.037                   |
|                                  | Yes                | N (Col%)   | 19 (10.61)  | 17 (9.5)   |                     | 0.037                   |
| B symptoms                       | No                 | N (Col%)   | 104 (58.1)  | 95 (53.07) | 0.626               | <b>0.101</b>            |
|                                  | Yes                | N (Col%)   | 72 (40.22)  | 81 (45.25) |                     | <b>0.102</b>            |
|                                  | Unknown            | N (Col%)   | 3 (1.68)    | 3 (1.68)   |                     | 0.000                   |
| NCCN-IPI category                | Low                | N (Col%)   | 15 (8.38)   | 12 (6.7)   | 0.803               | 0.064                   |
|                                  | Low-intermediate   | N (Col%)   | 76 (42.46)  | 78 (43.58) |                     | 0.023                   |
|                                  | High-intermediate  | N (Col%)   | 76 (42.46)  | 73 (40.78) |                     | 0.034                   |
|                                  | High               | N (Col%)   | 12 (6.7)    | 16 (8.94)  |                     | 0.083                   |
| CNS-IPI category                 | Low                | N (Col%)   | 39 (21.79)  | 38 (21.23) | 0.950               | 0.014                   |
|                                  | Moderate           | N (Col%)   | 87 (48.6)   | 90 (50.28) |                     | 0.034                   |
|                                  | High               | N (Col%)   | 53 (29.61)  | 51 (28.49) |                     | 0.025                   |
| Testis                           | No                 | N (Col%)   | 162 (90.5)  | 162 (90.5) | 1.000               | 0.000                   |
|                                  | Yes                | N (Col%)   | 17 (9.5)    | 17 (9.5)   |                     | 0.000                   |

## Appendix 2- Balance Check after matching

| Covariate                       | Level            | Statistics | LOT1 PPx      |               | Parametric P-value* | Standardized Difference |
|---------------------------------|------------------|------------|---------------|---------------|---------------------|-------------------------|
|                                 |                  |            | IV N=179      | IT N=179      |                     |                         |
| Double hit positive             | No               | N (Col%)   | 166 (92.74)   | 162 (90.5)    | 0.445               | 0.081                   |
|                                 | Yes              | N (Col%)   | 13 (7.26)     | 17 (9.5)      |                     |                         |
| Double hit evaluable            | No               | N (Col%)   | 43 (24.02)    | 46 (25.7)     | 0.714               | 0.039                   |
|                                 | Yes              | N (Col%)   | 136 (75.98)   | 133 (74.3)    |                     |                         |
| First line of therapy, 2-levels | RCHOP/R-miniCHOP | N (Col%)   | 120 (67.04)   | 131 (73.18)   | 0.204               | <b>0.135</b>            |
|                                 | REPOCH/DA-REPOCH | N (Col%)   | 59 (32.96)    | 48 (26.82)    |                     |                         |
| Age                             |                  | Mean (Std) | 57.08 (13.37) | 58.22 (13.62) | 0.425               | 0.084                   |

\* The parametric p value is calculated by ANOVA for numerical covariates and Chi-Square test for categorical covariates.

## Appendix 2- Balance Check after matching

| <b>Supplement Table 1: Prophylaxis-related toxicity</b>                                                                                                                                                                                                                               |                           |                                |                           |                                       |        |
|---------------------------------------------------------------------------------------------------------------------------------------------------------------------------------------------------------------------------------------------------------------------------------------|---------------------------|--------------------------------|---------------------------|---------------------------------------|--------|
| <b>Toxicity - no. (%)</b>                                                                                                                                                                                                                                                             | <b>Total<br/>(n=1162)</b> | <b>Intrathecal<br/>(n=894)</b> | <b>HD-MTX<br/>(n=236)</b> | <b>Switched<br/>route*<br/>(n=32)</b> |        |
| Any documented toxicity                                                                                                                                                                                                                                                               | 134 (11.5)                | 54 (6.0)                       | 60 (25.4)                 | 32                                    | 100    |
| <i>Category:</i>                                                                                                                                                                                                                                                                      |                           |                                |                           |                                       |        |
| Hematologic                                                                                                                                                                                                                                                                           | 23 (2.0)                  | 12 (1.3)                       | 10 (4.2)                  | 1                                     | (3.1)  |
| Renal impairment                                                                                                                                                                                                                                                                      | 47 (4.0)                  | 5 (0.6)                        | 34 (14.4)                 | 8                                     | (25.0) |
| Mucositis**                                                                                                                                                                                                                                                                           | 17 (1.5)                  | 6 (0.7)                        | 9 (3.8)                   | 2                                     | (6.3)  |
| Delayed MTX clearance&                                                                                                                                                                                                                                                                | 27 (2.3)                  | 0 (0)                          | 21 (8.9)                  | 6                                     | (18.8) |
| Headache                                                                                                                                                                                                                                                                              | 18 (1.5)                  | 17 (1.9)                       | 1 (0.4)                   | 0                                     | (0)    |
| Other neurologic                                                                                                                                                                                                                                                                      | 12 (1.0)                  | 11 (1.2)                       | 1 (0.4)                   | 0                                     | (0)    |
| Other / Not specified#                                                                                                                                                                                                                                                                | 38 (3.3)                  | 11 (1.2)                       | 12 (5.1)                  | 15                                    | (46.9) |
| <i>Abbreviations:</i> HD-MTX, high-dose methotrexate. *Includes switching in either direction between intrathecal and intravenous (HD-MTX) administration. **Excludes low-grade mucositis. # Per clinical documentation. & No patients received glucarpidase during the study period. |                           |                                |                           |                                       |        |
